# Supplementary material
Source: publisher figshare collection journal article supplement (https://tandf.figshare.com/ndownloader/files/22351122)
Supplement: Supplementary file 1 [file 22351122]

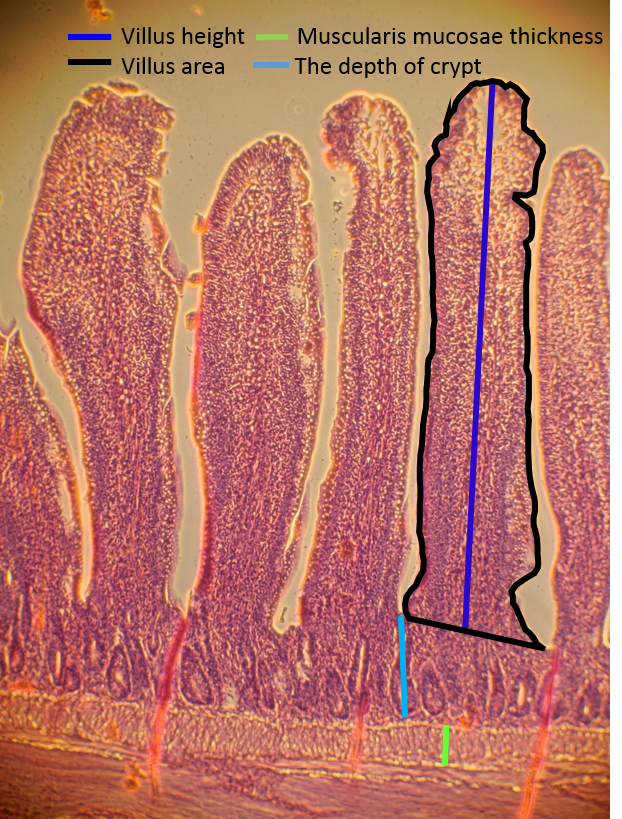


**Supplemental Figure.** Cross-section of the ileum, hematoxylin-eosin stained, displaying the measured parameters. villus height, villus area, crypt depth, and thickness of the muscularis mucosae.
